# Supplementary material for: One-step hydrothermal synthesis of photoluminescent carbon nanodots with selective antibacterial activity against Porphyromonas gingivalis
Source: Royal Society of Chemistry journal article supplement (doi:10.1039/c7nr02128c), 2017-01-01
Supplement: c7nr02128c1.pdf [file c7nr02128c1.pdf]

## SUPPORTING INFORMATION

### One step hydrothermal synthesis of photoluminescent carbon nanodots with excellent antibacterial activity

Junjun Liu,<sup>a</sup> Siyu Lu,<sup>a</sup> Qiuling Tang,<sup>b</sup> Kai, Zhang,<sup>a</sup> Weixian Yu,<sup>\*b</sup> Hongchen Sun<sup>b,a</sup> and Bai Yang<sup>\*a</sup>

<sup>a</sup>State Key Laboratory of Supramolecular Structure and Materials, College of Chemistry, Jilin University, Changchun 130012, P. R. China

<sup>b</sup>Department of Oral Pathology, College and Hospital of Stomatology, Jilin University, Changchun 130021, People's Republic of China. P. R. China

#### 1 Synthesis of other CNDs

Other conditions being equal to CNDs-250, CNDs-1h, CNDs-2h, CNDs-3h were obtained at 250 °C for 1 h, 2 h, 3 h, respectively. Certainly, CNDs-250 also could be named as CNDs-8h. Afterwards, we just changed the reaction temperature as 200 °C, 300 °C to prepare CNDs-200 and CNDs-300, respectively, but the other conditions were the same with CNDs-250.

#### 2 Bacterial culture and Antibacterial Experiments

*Porphyromonas gingivalis* (*P. gingivalis*) ATCC 33277 was used in all growth assays and cultures were anaerobically grown at 37 °C in an atmosphere containing CO<sub>2</sub> (5%), H<sub>2</sub> (10%), N<sub>2</sub> (85%). Firstly, *P. gingivalis* ATCC-33277 were cultured in solid medium, grown for 48 h, then took a small amount of them into 50 mL liquid medium after identifying they were pure, cultured for 24 h to use (CFU count 10<sup>8</sup> /mL). CNDs-250 and Metronidazole were doubly diluted to different concentrations from 320 µg/mL to 2.5 µg/mL, which including eight concentration gradients. 100 µL of bacterial suspension were added to each well in 96 well plates. After that, 100 µL of CNDs-250 with different concentration gradients were added to above

corresponding wells, respectively, making the final concentrations of CNDs-250 were 1.25, 2.5, 5, 10, 20, 40, 80 and 160 µg/mL. Meanwhile, the same treatment was adopted for Metronidazole. Besides, set the negative control: 100 µL of bacterial suspension and 100 µL of liquid medium were added into each well; the blank control: 100 µL of liquid medium and 100 µL of CNDs-250 were added into each well. Five parallel wells were prepared for each concentration of CNDs-250 and Metronidazole. At last, the resulting mixtures were shaken for *ca.* 5 min at room temperature and then these wells were incubated at 37 °C for 24 h. Bacterial growth was recorded at 600 nm against reagent blanks. *Streptococcus mutans* UA159 (*S. mutans*) was treated in the same way with *P. gingivalis*, and its bacterial growth was recorded at 550 nm. Monocolony of *Escherichia coli* ATCC25922 (*E. coli*) on the solid Luria-Bertani (LB) agar plate was transferred to 20 mL of liquid LB culture medium and grown at 37 °C for 24 h. Then the bacteria were diluted with broth to 10<sup>8</sup> CFU/mL, its bacterial growth was recorded at 450 nm. Then *E. coli* was treated with CNDs-250 at different concentration to test the antibacterial activity. The inhibition rate of bacterial can be evaluated as the following equation:

$$Inhibition (\%) = 1 - \frac{OD_{treated\ control}}{OD_{negative\ control}} \quad (1)$$

(Where OD<sub>treated control</sub> was obtained in the presence of CNDs-250 or Metronidazole, and OD<sub>negative control</sub> was obtained in the absence of CNDs-250 or Metronidazole.).

### 3 Quantum yields (QY) measurements

The QY was determined according to the following formula:

$$\phi_x = \phi_{st} * \frac{I_x}{I_{st}} * \frac{\eta_x^2}{\eta_{st}^2} * \frac{A_{st}}{A_x} \quad (2)$$

Where  $\phi$  is the QY, I is the measured integrated emission intensity,  $\eta$  is the refractive index of the solvent, and A is the absorbance at 360 nm wavelength. The subscript "st" refers to standard with known QY and "x" for the sample. Quinine sulfate with a known QY in 0.1 M H<sub>2</sub>SO<sub>4</sub> solution was employed as the fluorescence standard ( $\phi_{st} =$

---

54%,  $\eta_{st} = 1.33$ ). In order to minimize re-absorption effects, absorption in the 10 mm fluorescence cuvette was kept below 0.10.

#### 4 Calculation of radiative rate constant ( $k_r$ ) and non-radiative rate constant ( $k_{nr}$ )

The  $k_r$  and  $k_{nr}$  were calculated according to the following formulas:

$$\tau = \frac{1}{k_r + k_{nr}} \quad (3)$$

$$\phi = \frac{k_r}{k_r + k_{nr}} \quad (4)$$

Where  $\tau$  is the fluorescence lifetimes,  $k_r$  is radiative rate constant and  $k_{nr}$  is non-radiative rate constant.

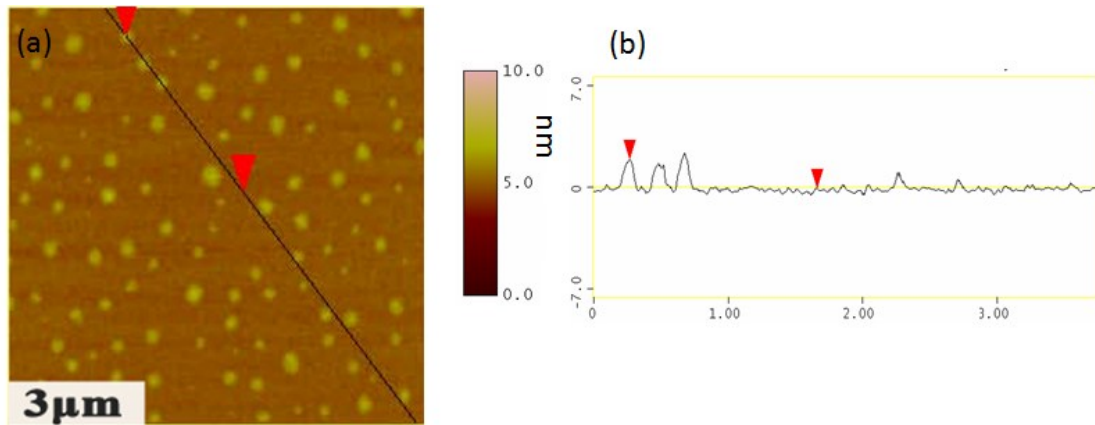

**Figure S1** The AFM image of CNDs-250; (d) the height profile along the line in (c).

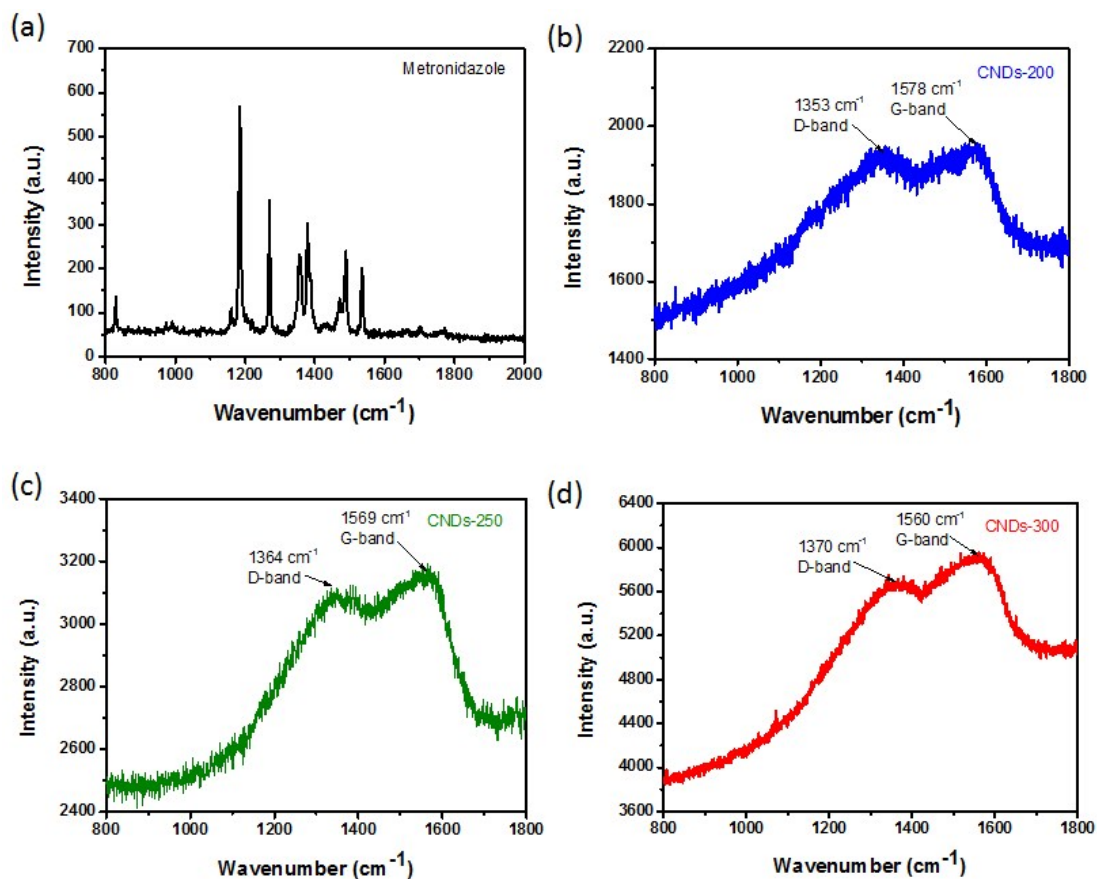

**Figure S2** The Raman spectra of the Metronidazole (a), CNDs-200 (b), CNDs-250 (c) and CNDs-300 (d), respectively.

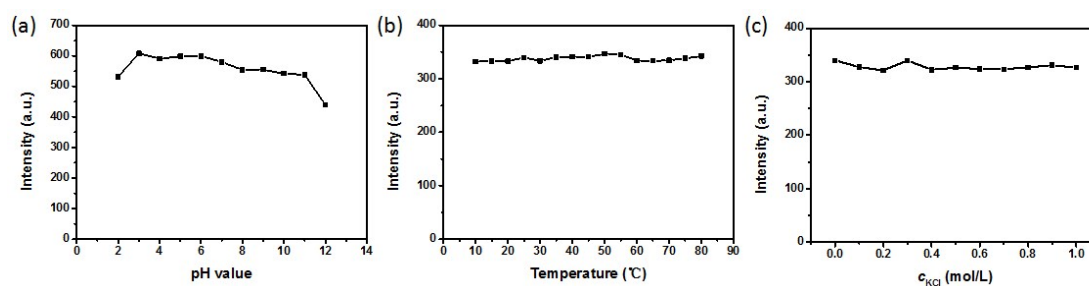

**Figure S3** Effects of pH (a), temperature (b) and ionic strength(c) on the fluorescence stability of the CNDs-250.

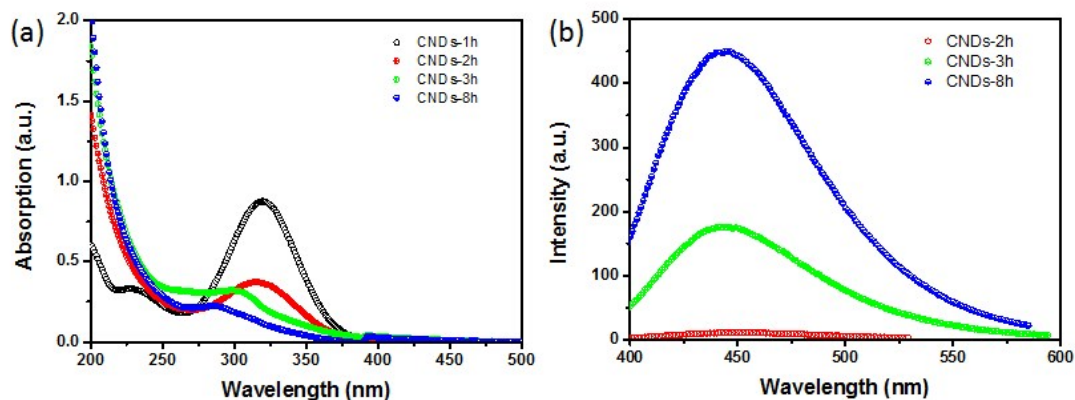

**Figure S4** The optical properties of CNDs. (a) UV-Vis absorption spectra of CNDs from different reaction time; (b) The PL emission spectra of CNDs-2h, CNDs-3h, CNDs-8h under 380 nm excitation wavelength, respectively.

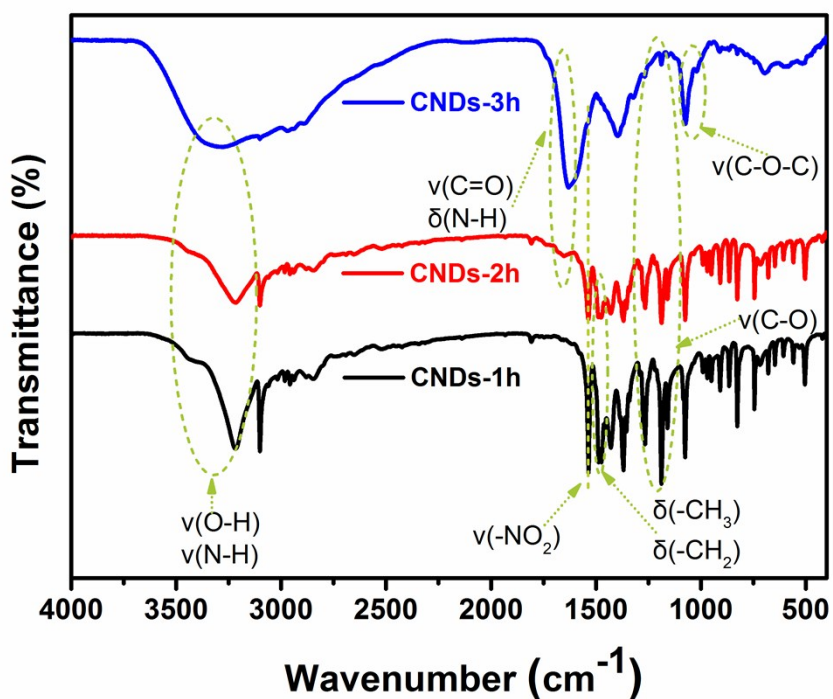

**Figure S5** The FTIR spectra of CNDs obtained after different reaction time.

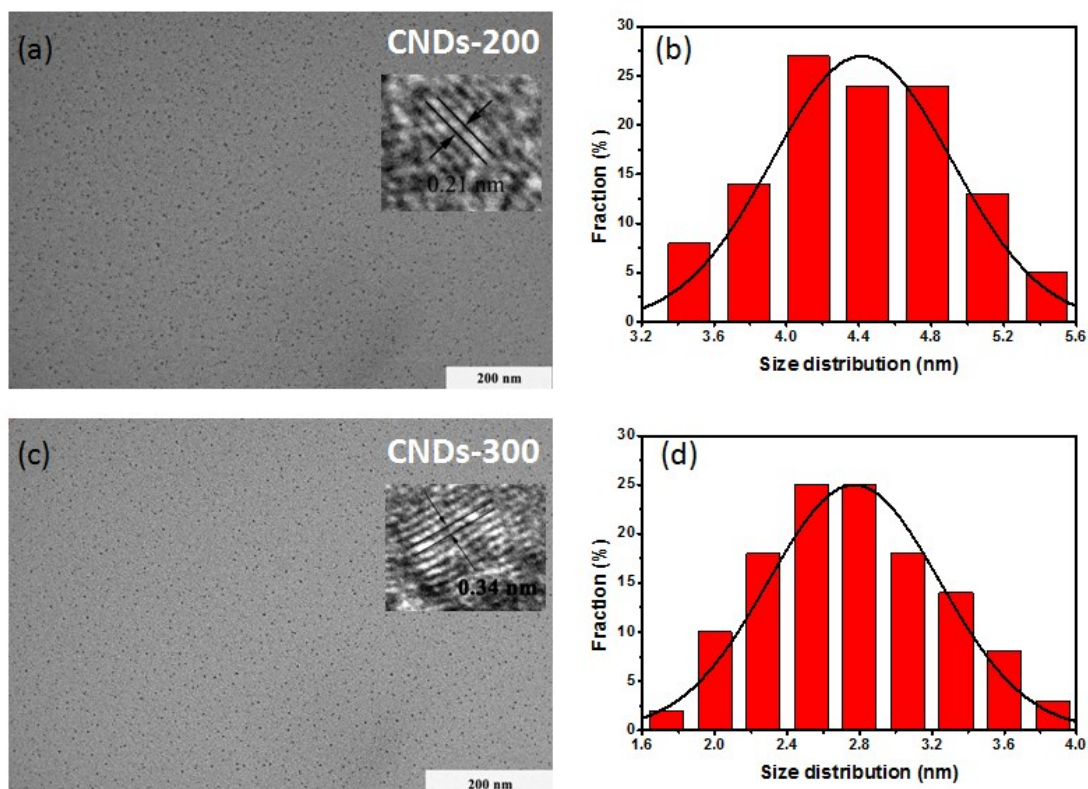

**Figure S6** HRTEM (a) and size distribution (b) images of CNDs-200; HRTEM (c) and size distribution (d) images of CNDs-300.

|          | Abs (nm) | $\lambda_{ex}$ (nm) | $\lambda_{em}$ (nm) | QY (%) | Size (nm) | $\tau_{ave}$ (ns) |
|----------|----------|---------------------|---------------------|--------|-----------|-------------------|
| CNDs-200 | 298      | 380                 | 445                 | 20.6   | 4.42      | 10.14             |
| CNDs-250 | 285      | 380                 | 443                 | 28.1   | 2.86      | 9.26              |
| CNDs-300 | 283      | 380                 | 443                 | 28.4   | 2.77      | 8.98              |

**Table S1** The absorption wavelength, optimal excitation and emission wavelength, QY, average size and average  $\tau$  of CNDs-200, CNDs-250 and CNDs-300, respectively.

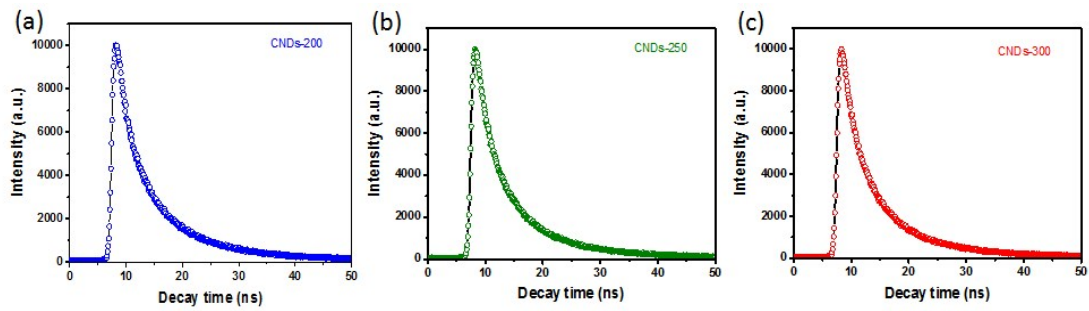

**Figure S7** The PL decay curves of CNDs-200 (a), CNDs-250 (b) and CNDs-300 (c).

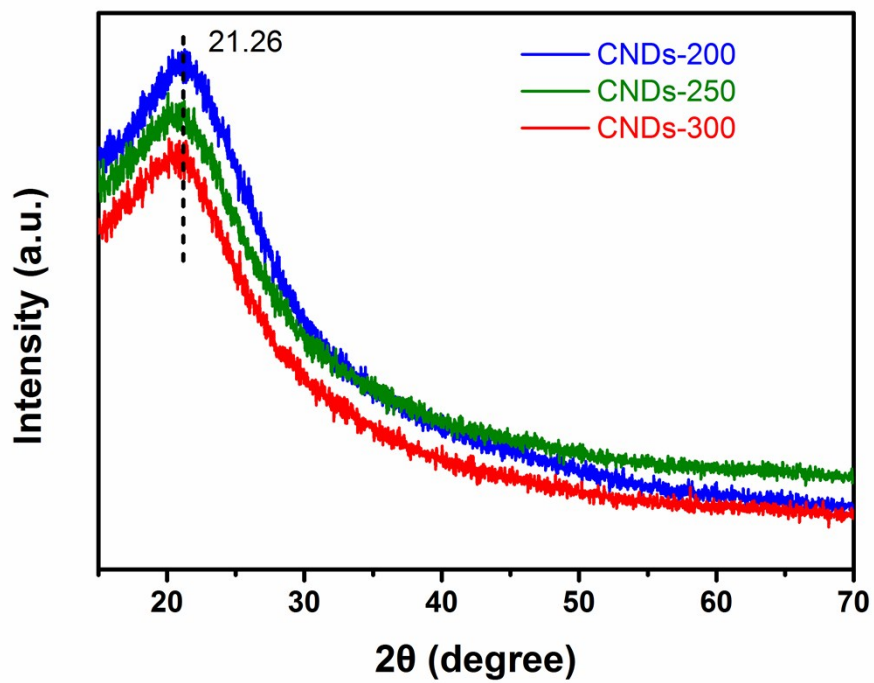

**Figure S8** The X-ray diffraction patterns of CNDs-200, CNDs-250 and CNDs-300, respectively.

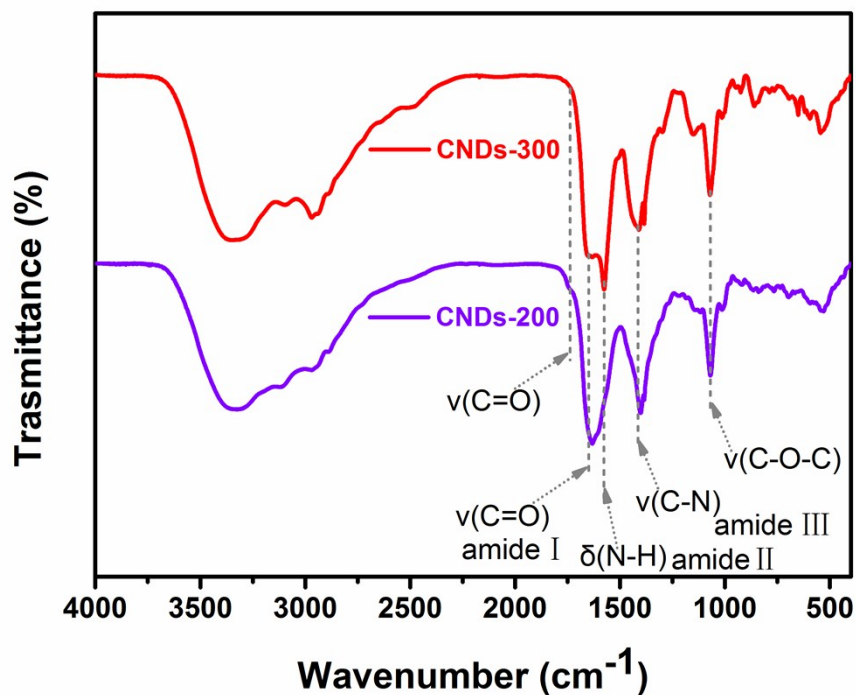

Figure S9 The FTIR spectra of CNDs-200 and CNDs-300, respectively.

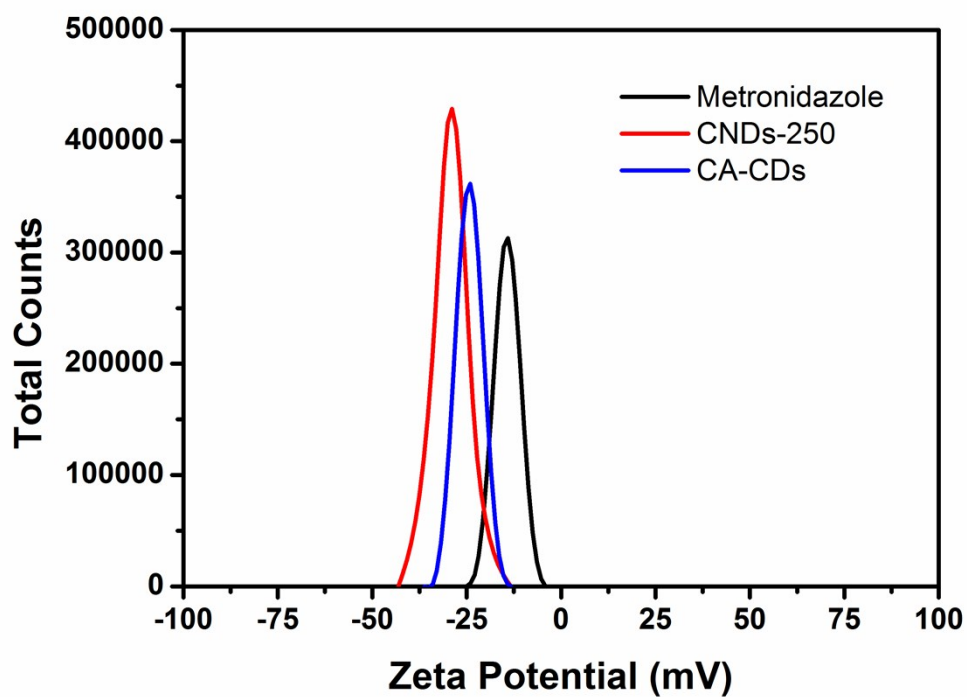

Figure S10 Zeta potential of Metronidazole, CNDs-250, CA-CDs in deionized water, respectively.



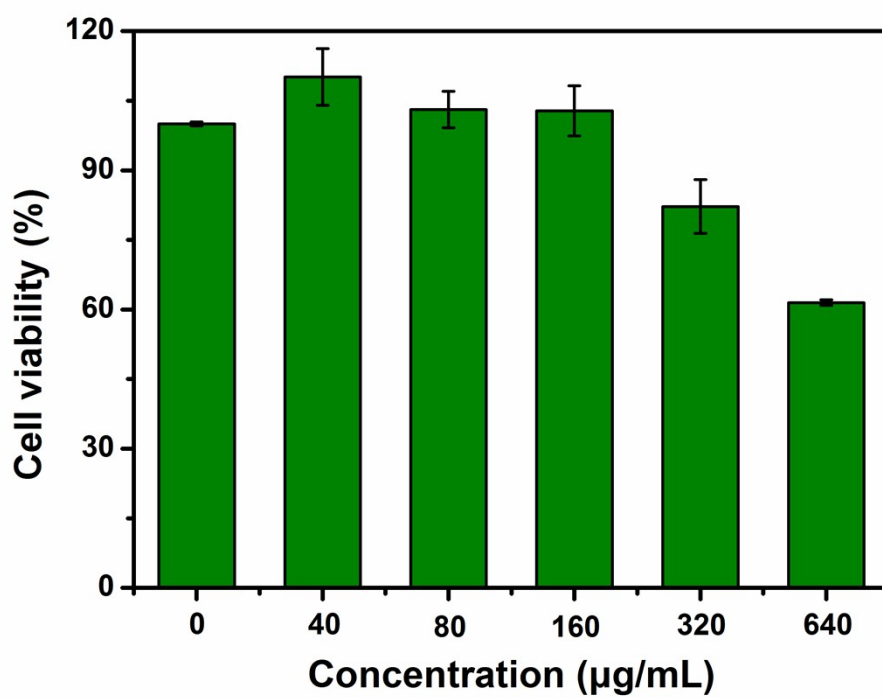

**Figure S11** Cell viability of MC3T3-E1 after incubation with various concentrations of Metronidazole for 24 h.
